# Supplementary material for: Localized basal area affects soil respiration temperature sensitivity in a coastal deciduous forest
Source: Copernicus journal article supplement (doi:10.5194/bg-17-771-2020), 2020-02-14
Supplement: Supplementary file 1 [file bg-17-771-2020-supplement.pdf]

Supplement of Biogeosciences, 17, 771–780, 2020  
<https://doi.org/10.5194/bg-17-771-2020-supplement>  
© Author(s) 2020. This work is distributed under  
the Creative Commons Attribution 4.0 License.

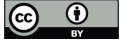

*Supplement of*

## **Localized basal area affects soil respiration temperature sensitivity in a coastal deciduous forest**

**Stephanie C. Pennington et al.**

*Correspondence to:* Stephanie C. Pennington ([stephanie.pennington@pnnl.gov](mailto:stephanie.pennington@pnnl.gov))

The copyright of individual parts of the supplement might differ from the CC BY 4.0 License.

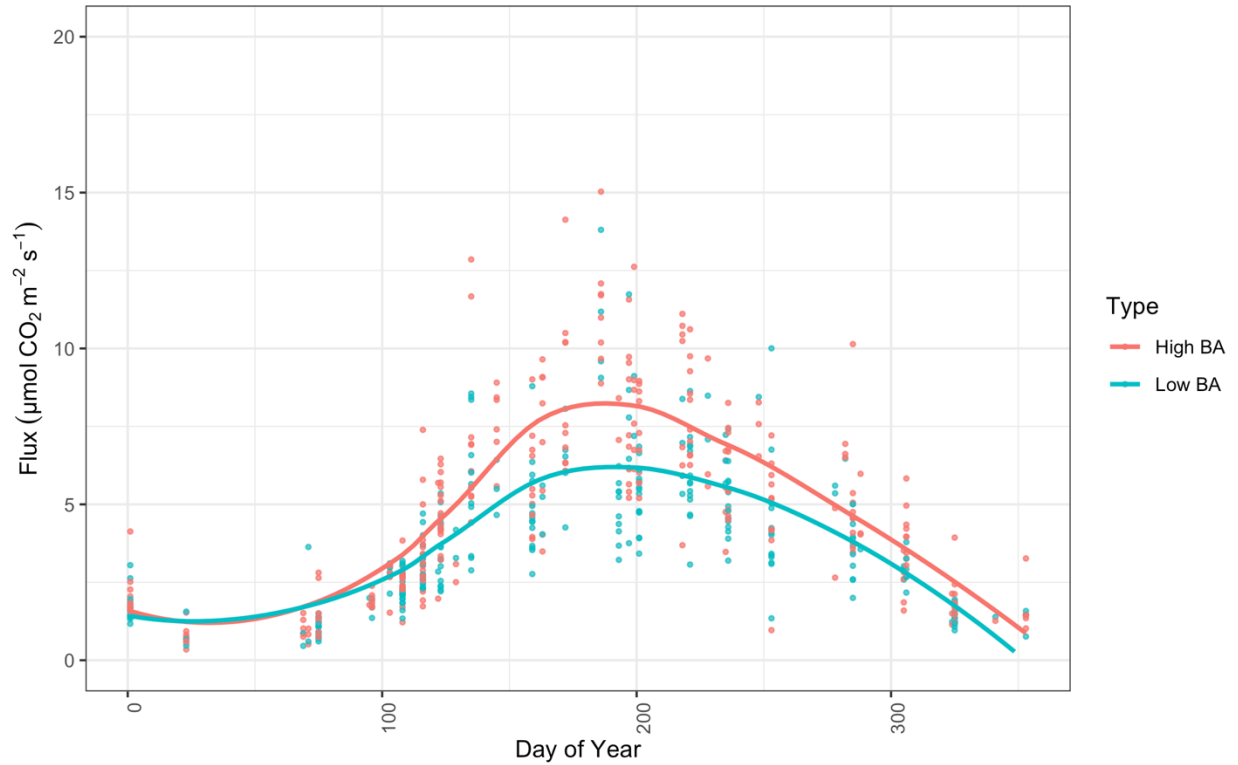

**Figure S1:** Raw respiration ( $R_s$ ) data by day of the year. The data are separated by collar locations with high- and low- basal area (BA) with a spline curve fit for each. Temperature varies significantly in the study sites and the changed temperature sensitivity results in a higher cumulative  $R_s$  flux for collars in high-BA locations. Localized basal area entered our model as a fixed effect (i.e., testing whether it raised  $R_s$  by itself; this was not significant) and in an interaction with temperature (testing whether it changed temperature sensitivity; this was significant).
